# Supplementary material for: Improving older adults’ vaccination uptake: are existing measures of vaccine hesitancy valid and reliable for older people?
Source: bioRxiv or medRxiv preprint supplement (doi:10.1101/2021.09.29.21263161), 2021-09-30
Supplement: Supplementary file [file media-2.pdf]

8<sup>th</sup> January 2020

Dear Applicants,

**Ethical Approval**

**SEC19/20: Williams, Nicholls, Rasmussen, Young & Gallant: Improving older adults' vaccination uptake: are existing measures of vaccine hesitancy valid and reliable for older people?**

I can confirm that the School of Psychological Sciences and Health Ethics Committee (SEC) has approved this study.

The SEC must be informed of any changes you plan to make to the research project, including any staff changes should these occur.

In the event of any ethical issues that arise during the project or if any adverse events occur, please inform SEC of these events at the earliest opportunity.

Oh behalf of the Committee, I wish you success with this project.

Kind regards,



Dr Joanne Cummings  
Psychological Sciences and Health Ethics Committee  
University of Strathclyde  
Graham Hills Building, 40 George Street,  
Glasgow, G1 1QE  
Tel: +44 (0) 141 548 2584  
Email: [joanne.cummings@strath.ac.uk](mailto:joanne.cummings@strath.ac.uk)
